# Supplementary material
Source: PubMed Central journal article supplement (PMC3719615)
Supplement: JCM.00535-13_zjm999092691so1.pdf [file JCM.00535-13_zjm999092691so1.pdf]

## Supplementary Materials

### Figure S1.

**Minimum Spanning tree of the 368 STs in the *S. suis* MLST database.** Any STs containing Chinese STs were marked red. STs selected for this study were marked with a blue star. Clonal complexes are shaded with different colours. The distance between STs are denoted by lines of different styles: thick solid black lines = 1 locus difference; thin solid black lines = 2 locus difference; dashed black line = 3 locus difference; dark grey lines = 4 locus difference; and light grey lines > 4 locus difference. (The figure is best viewed when zoomed in).

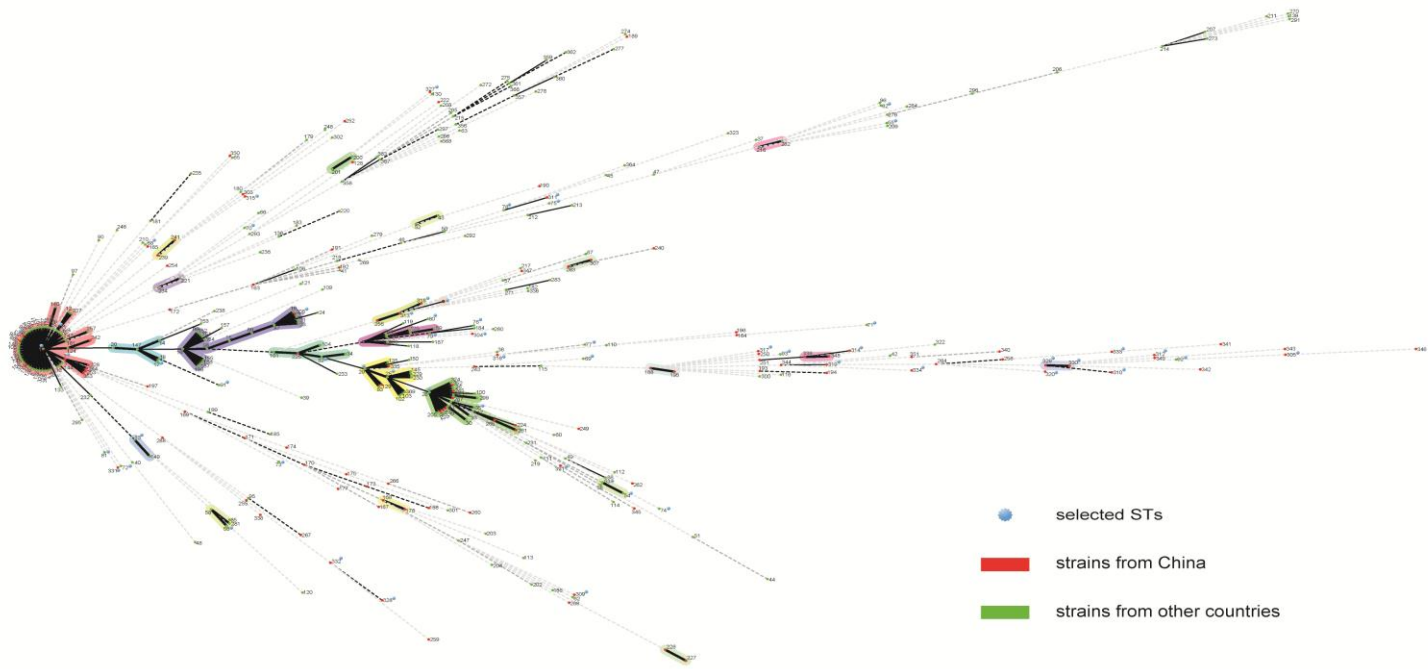

- selected STs
- strains from China
- strains from other countries

**Figure S2.** The percentage of core genome genes (MCG genes) and accessory genome genes (AG genes) in *S. suis* GZ1 according to function categories.

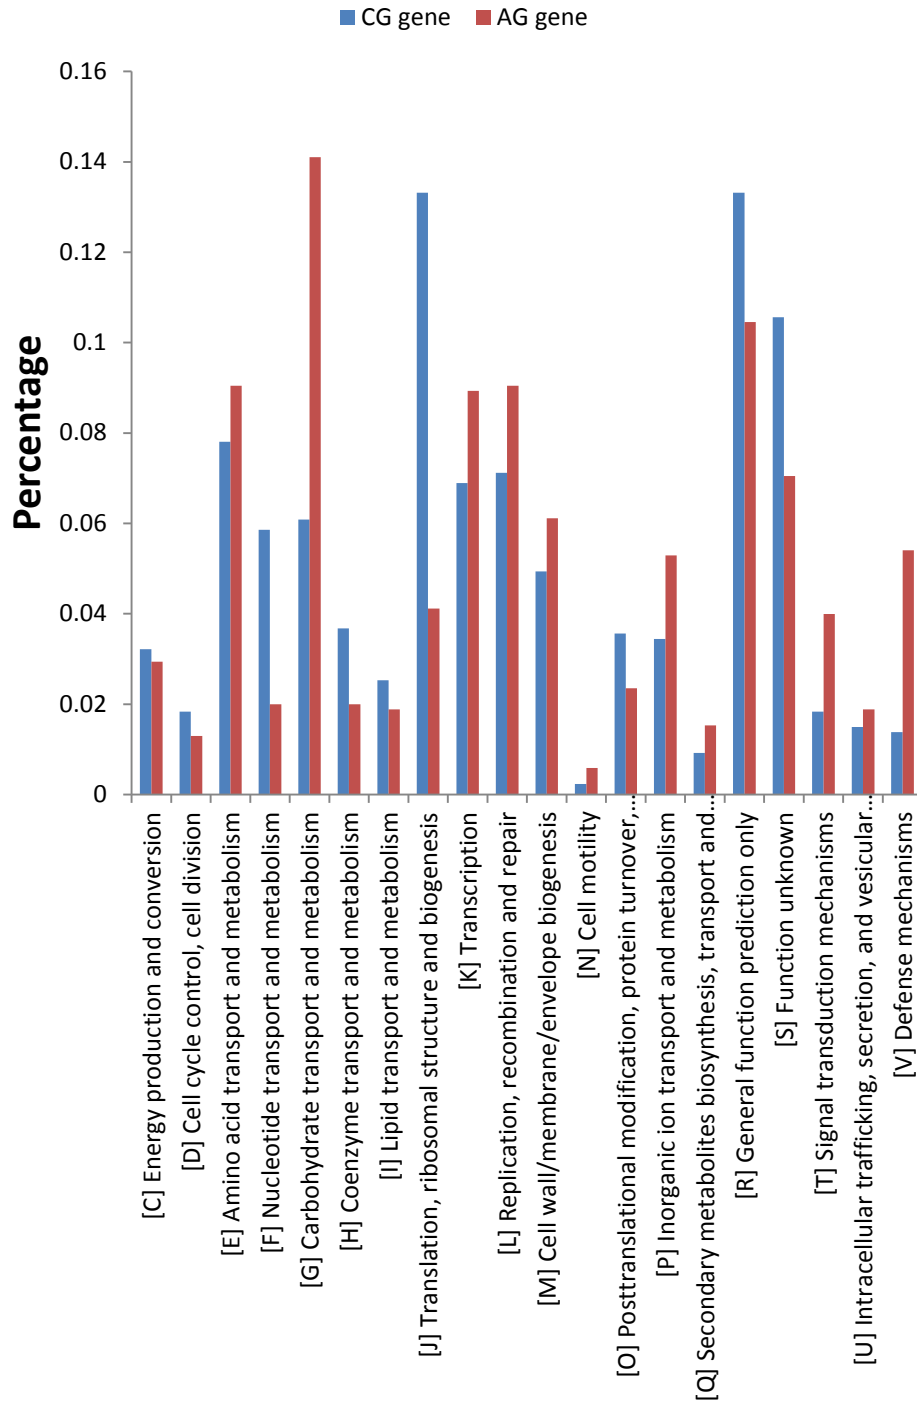

**Figure S3.** (A) The distribution of whole genome SNPs, core genome SNPs and accessory genome SNPs. X-axis denotes the SNP density in one kb for each gene and y-axis represents the density of genes in each window. (B) Relationship of all SNPs and core SNPs. X and y coordinate represent the density of whole genome SNPs and core genome SNPs, respectively. (C) Relationship of whole genome SNPs and absent genes. X and y coordinate represent the number of SNPs and absent genes of each strain comparing to reference genome *S. suis* GZ1, respectively.

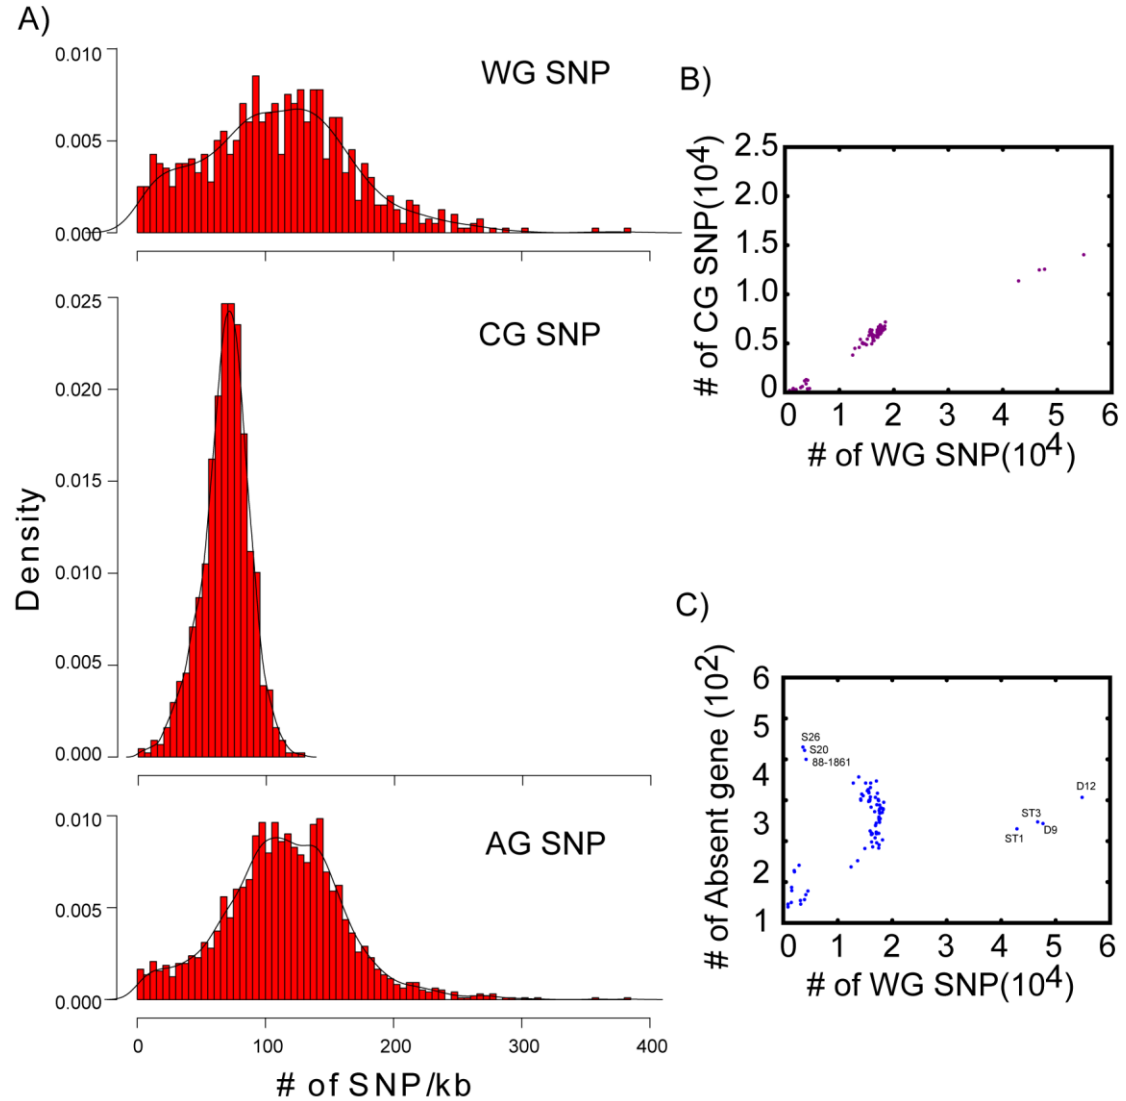

**Figure S4.** The function categories of three groups of core genes based on SNP density.

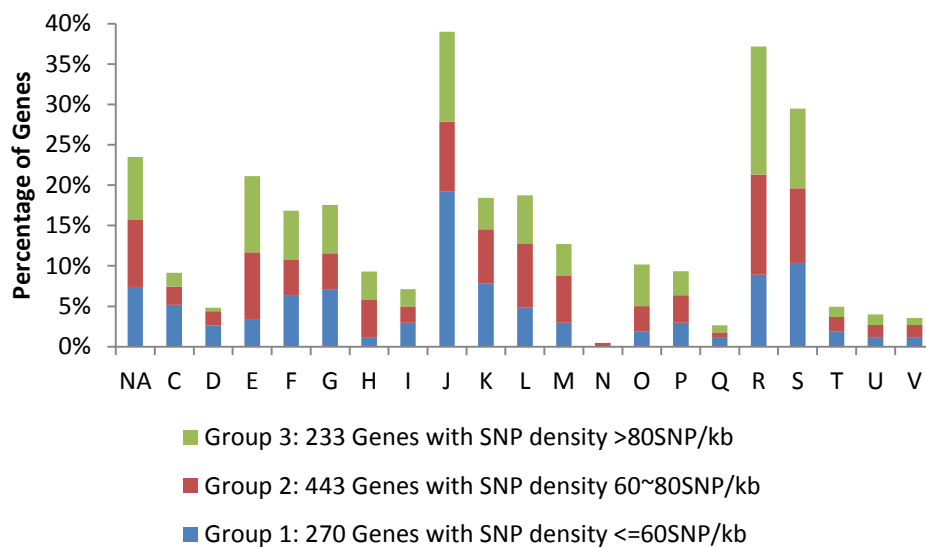

**Figure S5.** The NJ tree of present *S. suis* strains in 7 MCG groups with outgroup strain *Streptococcus pneumoniae* R6.

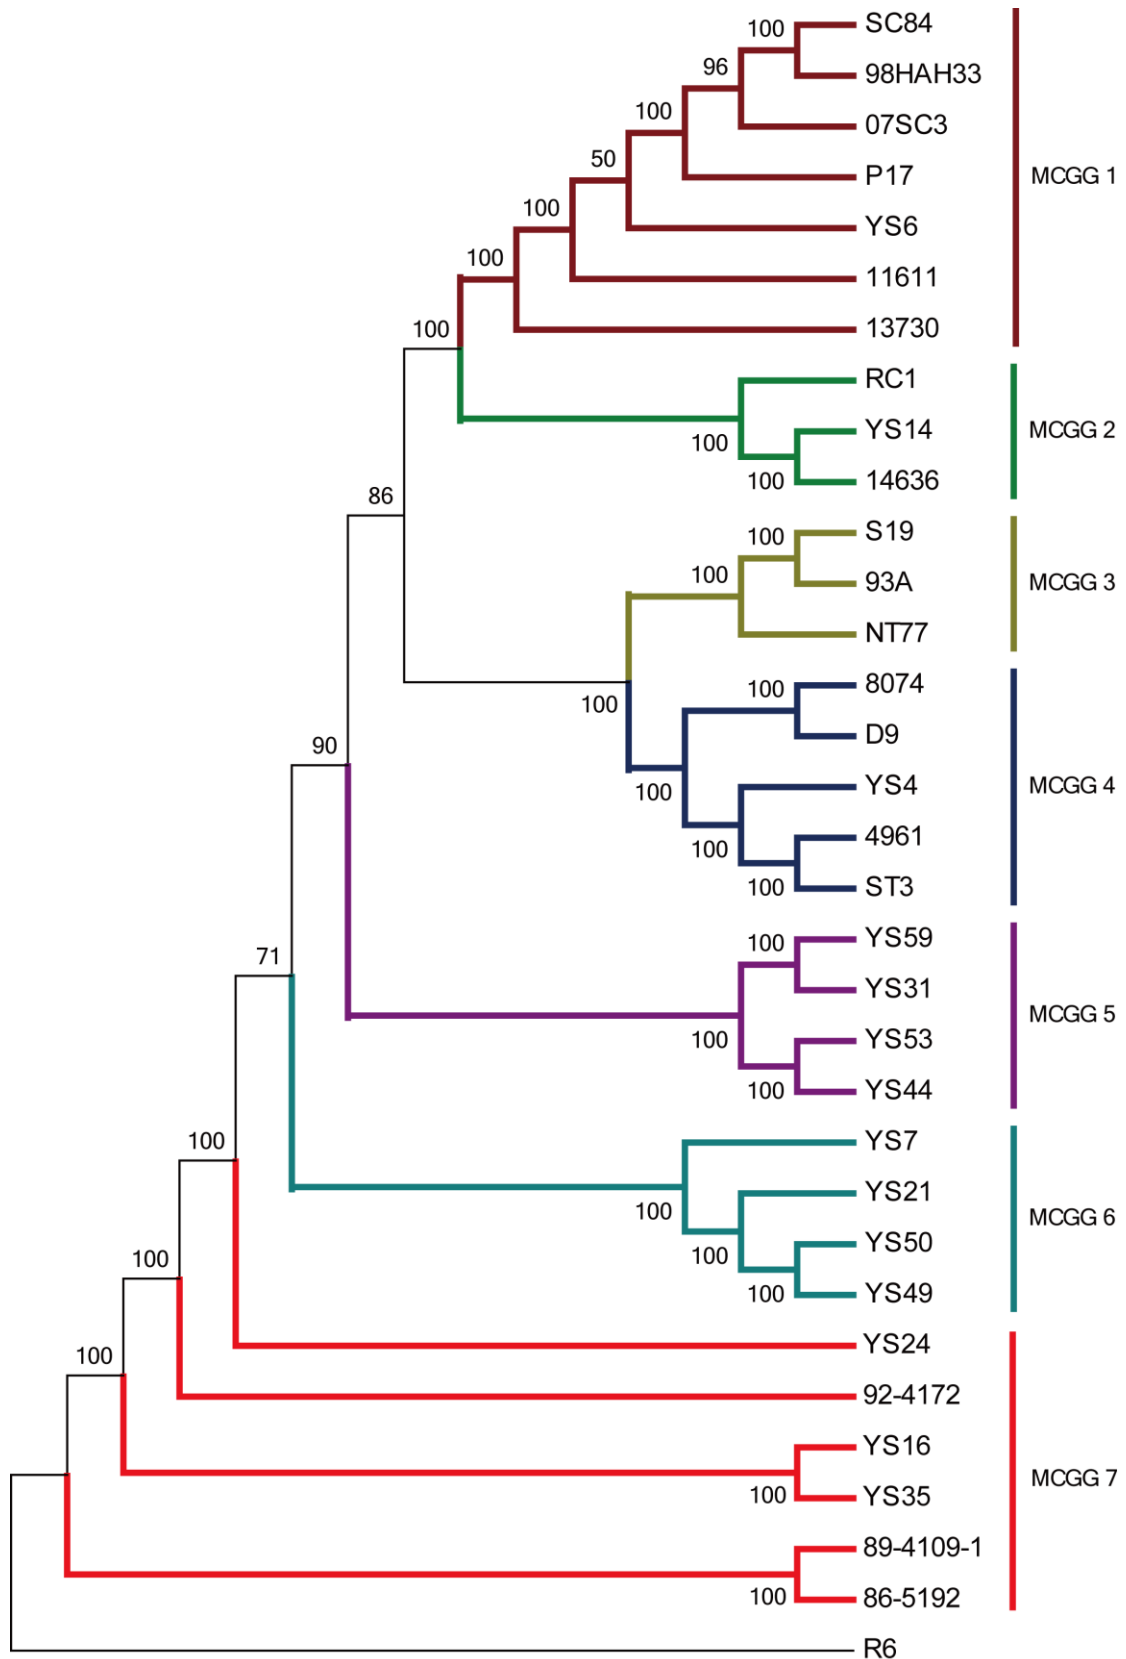

**Figure S6.** Estimated population structure (K=7). Each individual is represented by a thin vertical line, which is partitioned into K colored segments that represent the individual's estimated membership fractions.

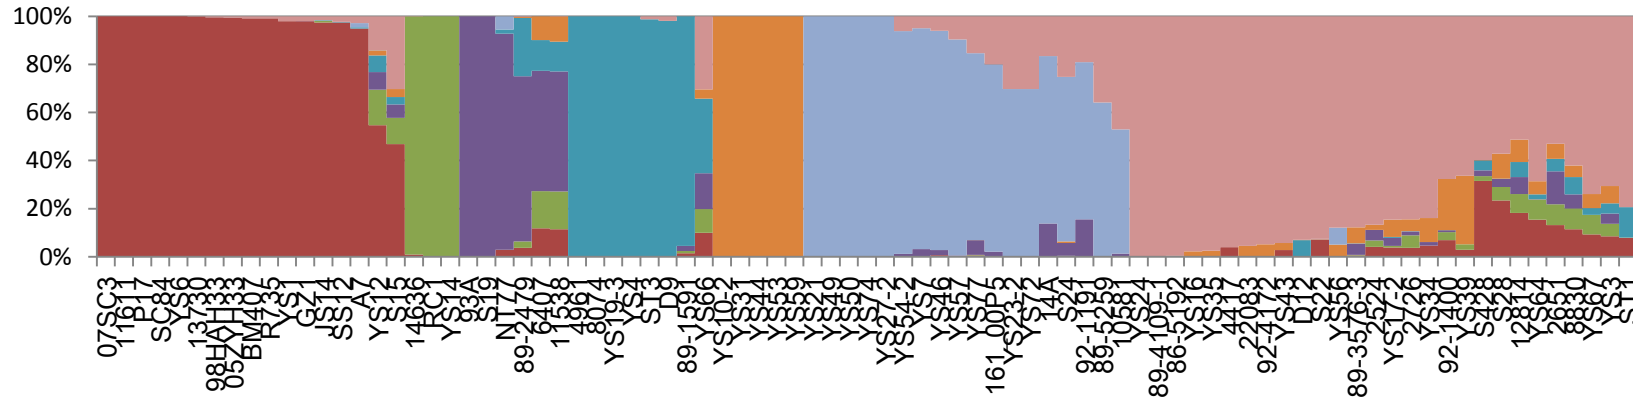

**Table S1.** Sequencing information of 72 strains.

| <b>Strain</b> | <b>#Scafflod</b> | <b>#ScfLen</b> | <b>CDS#</b> | <b>GC(%)</b> |
|---------------|------------------|----------------|-------------|--------------|
| 11611         | 102              | 2149119        | 2250        | 41.08        |
| 07SC3         | 24               | 2039810        | 1958        | 41.21        |
| 161_00P5      | 26               | 2062220        | 1972        | 41.05        |
| 89-1591       | 83               | 2270244        | 2037        | 41.39        |
| RC1           | 35               | 2198129        | 2218        | 41.05        |
| S428          | 76               | 1987921        | 2036        | 41.42        |
| 2651          | 37               | 2224018        | 2231        | 41.4         |
| 4417          | 70               | 2069567        | 1996        | 41.13        |
| 12814         | 33               | 2198386        | 2304        | 41.07        |
| 8830          | 28               | 1984673        | 1992        | 40.81        |
| 10581         | 51               | 2483953        | 2512        | 41.06        |
| 13730         | 34               | 1962186        | 1954        | 41.33        |
| S15           | 29               | 2015465        | 1963        | 41.3         |
| 2726          | 45               | 2224039        | 2282        | 41.06        |
| 93A           | 154              | 2328965        | 2240        | 41.06        |
| NT77          | 125              | 2318985        | 2445        | 41.03        |
| S19           | 150              | 2293667        | 2318        | 41.18        |
| R735          | 35               | 1950587        | 1904        | 41.36        |
| 86-5192       | 39               | 2111528        | 2121        | 39.94        |
| 14A           | 94               | 2350341        | 2360        | 41.37        |
| S22           | 72               | 2275838        | 2379        | 39.68        |
| 89-2479       | 38               | 2169000        | 2259        | 40.95        |



|           |     |         |      |       |
|-----------|-----|---------|------|-------|
| S24       | 78  | 2339565 | 2268 | 41.29 |
| 89-3576-3 | 63  | 2126721 | 2059 | 41.31 |
| 89-4109-1 | 59  | 2178521 | 2203 | 39.88 |
| 89-5259   | 111 | 2462624 | 2393 | 41.28 |
| S28       | 46  | 2163749 | 2178 | 41.2  |
| 92-1191   | 135 | 2356931 | 2312 | 41.27 |
| 4961      | 53  | 2018439 | 1996 | 41.22 |
| 92-1400   | 62  | 2308516 | 2266 | 40.79 |
| 92-4172   | 87  | 2305152 | 1685 | 41.26 |
| 6407      | 42  | 2250266 | 2293 | 40.91 |
| 11538     | 27  | 2166871 | 1567 | 40.93 |
| 2524      | 51  | 1883386 | 1792 | 41.5  |
| 8074      | 88  | 2060773 | 2112 | 41.19 |
| 14636     | 26  | 2081361 | 2111 | 41.16 |
| 22083     | 26  | 2026680 | 1955 | 41.49 |
| YS1       | 20  | 2031282 | 1972 | 41.26 |
| YS10-2    | 44  | 2221121 | 2274 | 40.95 |
| YS12      | 42  | 2080241 | 1970 | 41.12 |
| YS14      | 30  | 2172902 | 1542 | 40.97 |
| YS16      | 33  | 2332845 | 2344 | 40.98 |
| YS17-2    | 46  | 2339153 | 2314 | 41.03 |
| YS19-3    | 50  | 2110290 | 2125 | 41.12 |
| YS21      | 91  | 2474394 | 2445 | 41.31 |
| YS23-2    | 52  | 2348283 | 1582 | 41.4  |

|        |     |         |      |       |
|--------|-----|---------|------|-------|
| YS24   | 48  | 2107854 | 1999 | 41.2  |
| YS27-2 | 90  | 2430841 | 2350 | 41.25 |
| YS3    | 43  | 2172487 | 2118 | 41.02 |
| YS31   | 29  | 2230390 | 2204 | 41.04 |
| YS34   | 45  | 2376987 | 2301 | 41.02 |
| YS35   | 50  | 2321968 | 2223 | 40.92 |
| YS39   | 53  | 2243368 | 1546 | 40.96 |
| YS4    | 54  | 2110742 | 1995 | 41.09 |
| YS43   | 48  | 2054213 | 1624 | 41.21 |
| YS44   | 37  | 2208333 | 2211 | 41.11 |
| YS46   | 114 | 2430062 | 2460 | 41.21 |
| YS49   | 92  | 2412706 | 2246 | 41.3  |
| YS50   | 89  | 2419800 | 2400 | 41.29 |
| YS53   | 35  | 2208787 | 2264 | 41.11 |
| YS54-2 | 87  | 2318900 | 2246 | 41.24 |
| YS56   | 61  | 2234172 | 2414 | 41.17 |
| YS57   | 114 | 2521029 | 1736 | 41.15 |
| YS59   | 44  | 2202033 | 2141 | 41    |
| YS6    | 26  | 2039819 | 2057 | 41.13 |
| YS64   | 41  | 2067782 | 2102 | 41.11 |
| YS66   | 29  | 2060760 | 2081 | 41.18 |
| YS67   | 27  | 2182719 | 2139 | 41.1  |
| YS7    | 77  | 2354331 | 2311 | 41.26 |
| YS72   | 48  | 2361733 | 2276 | 41.43 |

|      |    |         |      |       |
|------|----|---------|------|-------|
| YS74 | 89 | 2471261 | 2543 | 41.19 |
| YS77 | 85 | 2264602 | 2421 | 41.44 |

**Table S2.** The 50 lowest SNP density MCG genes.

| Gene       | Gene_Length | COG | SNP#(1kb) | Gene_Annotation                                                                             |
|------------|-------------|-----|-----------|---------------------------------------------------------------------------------------------|
| SSGZ1_1335 | 1308        | G   | 45.87     | putative Enolase                                                                            |
| SSGZ1_1289 | 1374        | R   | 45.12     | tRNA modification GTPase TrmE                                                               |
| SSGZ1_0081 | 399         | J   | 45.11     | ribosomal protein S8                                                                        |
| SSGZ1_0002 | 1137        | L   | 43.98     | DNA polymerase III, beta subunit                                                            |
| SSGZ1_0987 | 1254        | S   | 43.86     | hypothetical protein                                                                        |
| SSGZ1_1471 | 693         | G   | 43.29     | Phosphoglycerate mutase 1                                                                   |
| SSGZ1_1829 | 813         | U   | 43.05     | in regions AI 121: Region of the GZ1 chromosome not homologous to 89/1591                   |
| SSGZ1_1128 | 489         |     | 42.94     | conserved hypothetical protein                                                              |
| SSGZ1_0001 | 1374        | L   | 42.94     | chromosomal replication initiator protein, DnaA                                             |
| SSGZ1_1697 | 210         |     | 42.86     | in regions AI 110: Region of the GZ1 chromosome not homologous to 89/1591                   |
| SSGZ1_0030 | 1548        | F   | 42.64     | Bifunctional phosphoribosylaminoimidazolecarboxamide formyltransferase / IMP cyclohydrolase |
| SSGZ1_0078 | 306         | J   | 42.48     | ribosomal protein L24                                                                       |
| SSGZ1_0142 | 471         | J   | 42.46     | in regions AI 9: Region of the GZ1 chromosome not homologous to 89/1591                     |
| SSGZ1_1621 | 477         | I   | 41.93     | Acetyl-CoA biotin carboxyl carrier                                                          |
| SSGZ1_0521 | 1215        | J   | 41.15     | in regions AI 35: Region of the GZ1 chromosome not homologous to 89/1591                    |
| SSGZ1_0451 | 537         | K   | 40.97     | in regions AI 32: Region of the GZ1 chromosome not homologous to 89/1591                    |
| SSGZ1_0351 | 708         | K   | 40.96     | Bacterial regulatory protein, GntR                                                          |
| SSGZ1_1914 | 759         | S   | 40.84     | hypothetical protein                                                                        |
| SSGZ1_1277 | 1128        | H   | 40.78     | in regions AI 81: Region of the GZ1 chromosome not homologous to 89/1591                    |
| SSGZ1_0085 | 495         | J   | 40.40     | ribosomal protein S5                                                                        |

|            |      |   |       |                                                                                       |
|------------|------|---|-------|---------------------------------------------------------------------------------------|
| SSGZ1_0718 | 375  | F | 40.00 | Anaerobic ribonucleoside-triphosphate reductase                                       |
| SSGZ1_1850 | 450  | K | 40.00 | regulatory protein, MarR                                                              |
| SSGZ1_0530 | 783  |   | 39.59 | Predicted membrane protein                                                            |
| SSGZ1_0645 | 2283 | R | 39.42 | ComEC/Rec2-related protein: DNA internalization-related competence protein ComEC/Rec2 |
| SSGZ1_0395 | 534  | J | 39.33 | Protein of unknown function DUF402                                                    |
| SSGZ1_0083 | 537  | J | 39.11 | ribosomal protein L6                                                                  |
| SSGZ1_1931 | 1689 | J | 39.08 | Arginyl-tRNA synthetase                                                               |
| SSGZ1_1514 | 276  | S | 36.23 | in regions AI 96: Region of the GZ1 chromosome not homologous to 89/1591              |
| SSGZ1_0603 | 498  | S | 36.14 | hypothetical protein                                                                  |
| SSGZ1_1463 | 636  | F | 34.59 | in regions AI 94: Region of the GZ1 chromosome not homologous to 89/1591              |
| SSGZ1_0309 | 819  | G | 34.19 | in regions AI 24: Region of the GZ1 chromosome not homologous to 89/1591              |
| SSGZ1_0367 | 618  | R | 33.98 | Recombination protein U                                                               |
| SSGZ1_1847 | 444  | F | 33.78 | DeoxyUTP pyrophosphatase                                                              |
| SSGZ1_1559 | 303  | K | 33.00 | hypothetical protein                                                                  |
| SSGZ1_0960 | 243  | J | 32.92 | ribosomal protein S20                                                                 |
| SSGZ1_1182 | 426  | J | 32.86 | ribosomal protein L11                                                                 |
| SSGZ1_1721 | 1137 | G | 32.54 | Sulfate-transporting ATPase                                                           |
| SSGZ1_0079 | 543  | J | 31.31 | ribosomal protein L5                                                                  |
| SSGZ1_1413 | 321  |   | 31.15 | conserved hypothetical protein                                                        |
| SSGZ1_1096 | 1047 | O | 28.65 | PpiC-type peptidyl-prolyl cis-trans isomerase                                         |
| SSGZ1_1399 | 282  | L | 28.37 | Excinuclease ABC, C subunit, N-terminal                                               |
| SSGZ1_1799 | 177  | U | 28.25 | in regions AI 117: Region of the GZ1 chromosome not homologous to 89/1591             |
| SSGZ1_1620 | 303  | I | 26.40 | Beta-hydroxyacyl-(acyl-carrier-protein) dehydratase FabZ                              |
| SSGZ1_0441 | 231  | S | 25.97 | in regions AI 31: Region of the GZ1 chromosome not homologous to 89/1591              |
| SSGZ1_0644 | 663  | L | 25.64 | Competence protein ComEA helix-hairpin-helix region                                   |
| SSGZ1_1830 | 402  | J | 24.88 | RNaseP protein                                                                        |

|            |     |   |       |                                                                          |
|------------|-----|---|-------|--------------------------------------------------------------------------|
| SSGZ1_1089 | 567 |   | 22.93 | in regions AI 68: Region of the GZ1 chromosome not homologous to 89/1591 |
| SSGZ1_0076 | 261 | J | 19.16 | in regions AI 5: Region of the GZ1 chromosome not homologous to 89/1591  |
| SSGZ1_0870 | 459 | J | 13.07 | Ribosomal protein L7/L12                                                 |
| SSGZ1_0084 | 366 | J | 10.93 | ribosomal protein L18                                                    |

**Table S3.** The top 50 SNPs density MCG genes

| Gene       | Gene_Length | COG | SNP#(1kb) | Gene_Annotation                                                          |
|------------|-------------|-----|-----------|--------------------------------------------------------------------------|
| SSGZ1_0746 | 669         | S   | 127.06    | putative membrane protein                                                |
| SSGZ1_1596 | 1074        | P   | 120.11    | Sulfate-transporting ATPase                                              |
| SSGZ1_0185 | 747         |     | 112.45    | Methyl-accepting chemotaxis protein                                      |
| SSGZ1_1010 | 303         |     | 112.21    | hypothetical protein                                                     |
| SSGZ1_0828 | 834         | J   | 111.51    | Modification methylase HemK                                              |
| SSGZ1_1810 | 876         | R   | 109.59    | Predicted GTPase                                                         |
| SSGZ1_1107 | 870         | E   | 109.20    | Shikimate 5-dehydrogenase                                                |
| SSGZ1_0339 | 744         | QR  | 108.87    | SAM-dependent methyltransferase                                          |
| SSGZ1_0733 | 765         |     | 107.19    | in regions AI 49: Region of the GZ1 chromosome not homologous to 89/1591 |
| SSGZ1_1108 | 1068        | E   | 106.74    | 3-dehydroquinate synthase                                                |
| SSGZ1_0873 | 930         | LU  | 106.45    | SMF protein                                                              |
| SSGZ1_0321 | 303         | J   | 105.61    | Glutamyl-tRNA(Gln) amidotransferase C subunit                            |
| SSGZ1_0271 | 267         | T   | 104.87    | in regions AI 21: Region of the GZ1 chromosome not homologous to 89/1591 |
| SSGZ1_1929 | 2544        | L   | 104.56    | MutS-1 protein                                                           |
| SSGZ1_0151 | 231         | S   | 103.90    | Uncharacterized conserved small protein                                  |
| SSGZ1_1184 | 387         | E   | 103.36    | putative lactoylglutathione lyase                                        |
| SSGZ1_0338 | 360         | S   | 102.78    | Iojap-related protein                                                    |
| SSGZ1_1486 | 216         | L   | 101.85    | Exonuclease VII, small subunit                                           |
| SSGZ1_1947 | 1035        | M   | 101.45    | Putative glycosyl transferase                                            |
| SSGZ1_1900 | 444         | J   | 101.35    | in regions AI 127: Region of the GZ1 chromosome not homologous           |

to 89/1591

|            |           |       |                                                                                        |
|------------|-----------|-------|----------------------------------------------------------------------------------------|
| SSGZ1_1917 | 471       | 99.79 | hypothetical protein                                                                   |
| SSGZ1_0625 | 705 G     | 99.29 | Glucosamine/galactosamine-6-phosphate isomerase                                        |
| SSGZ1_1392 | 1161 E    | 99.05 | aminotransferase                                                                       |
| SSGZ1_0735 | 759 M     | 98.81 | D-alanyl-D-alanine carboxypeptidase                                                    |
| SSGZ1_0417 | 1848 T    | 97.94 | GTP-binding protein TypA                                                               |
| SSGZ1_1817 | 909 J     | 97.91 | Dimethyladenosine transferase                                                          |
| SSGZ1_1284 | 675 G     | 97.78 | Ribose 5-phosphate isomerase                                                           |
| SSGZ1_1275 | 618 F     | 97.09 | NUDIX hydrolase                                                                        |
| SSGZ1_0868 | 1335 J    | 96.63 | Gid protein                                                                            |
| SSGZ1_0322 | 1467 J    | 96.11 | Glutamyl-tRNA(Gln) amidotransferase A subunit                                          |
| SSGZ1_1759 | 594 E     | 95.96 | 3-isopropylmalate dehydratase small subunit                                            |
| SSGZ1_0599 | 606 R     | 95.71 | NADPH-dependent FMN reductase                                                          |
| SSGZ1_1321 | 1035 R    | 95.65 | ABC-type uncharacterized transport system, periplasmic component                       |
| SSGZ1_0027 | 1455 F    | 94.85 | Amidophosphoribosyl transferase                                                        |
| SSGZ1_1756 | 1257 GEPR | 94.67 | Permease of the major facilitator superfamily                                          |
| SSGZ1_1241 | 402 M     | 94.53 | in regions AI 77: Region of the GZ1 chromosome not homologous<br>to 89/1591            |
| SSGZ1_0827 | 1095 J    | 94.06 | Peptide chain release factor 1                                                         |
| SSGZ1_0216 | 2334 L    | 93.83 | DNA structure-specific ATPase involved in suppression of<br>recombination, MutS family |
| SSGZ1_1093 | 1194 J    | 93.80 | Alanyl-tRNA synthetase, class IIc                                                      |
| SSGZ1_0360 | 984 R     | 93.50 | Rhodanese-like protein                                                                 |
| SSGZ1_0815 | 840 F     | 92.86 | Thymidylate synthase                                                                   |
| SSGZ1_1736 | 399 S     | 92.73 | Uncharacterized conserved protein                                                      |
| SSGZ1_0220 | 939 O     | 92.65 | Peptide methionine sulfoxide reductase                                                 |
| SSGZ1_1197 | 1545 J    | 92.56 | Peptide chain release factor 3                                                         |
| SSGZ1_0208 | 996 R     | 92.37 | proposed virulence factor                                                              |
| SSGZ1_1502 | 555 QR    | 91.89 | Putative rRNA methylase                                                                |
| SSGZ1_1332 | 654 R     | 91.74 | HAD-superfamily hydrolase                                                              |
| SSGZ1_1274 | 774 G     | 91.73 | HAD-superfamily subfamily IIA hydrolase                                                |

|            |     |   |       |                                    |
|------------|-----|---|-------|------------------------------------|
| SSGZ1_1295 | 579 | L | 91.54 | Uracil-DNA glycosylase superfamily |
| SSGZ1_1281 | 810 | F | 91.36 | Purine nucleoside phosphorylase 1  |

**Table S4.** Ln probability of 85 strains using Structure from K=2 to K15 (BURNIN=50000 and NUMREPS=150000).

| K  | Ln Prob  |          |          |          |          | Avg      |
|----|----------|----------|----------|----------|----------|----------|
|    | 1        | 2        | 3        | 4        | 5        |          |
| 3  | -773633  | -778824  | -775478  | -779350  | -781946  | -777846  |
| 4  | -722604  | -717157  | -715467  | -717361  | -722655  | -719049  |
| 5  | -701979  | -699990  | -690599  | -690914  | -688266  | -694350  |
| 6  | -662034  | -666211  | -659236  | -657441  | -658641  | -660713  |
| 7  | -638266  | -629659  | -630083  | -634596  | -632543  | -633029  |
| 8  | -722285  | -634885  | -627486  | -620956  | -675057  | -656134  |
| 9  | -987961  | -892512  | -699480  | -617733  | -611452  | -761828  |
| 10 | -1.6E+07 | -7883639 | -4.1E+07 | -1.3E+07 | -5.1E+07 | -2.6E+07 |
| 11 | -2.2E+08 | -3336368 | -9.3E+07 | -3408706 | -1.3E+07 | -6.7E+07 |
| 12 | -1.2E+08 | -1.1E+07 | -2.9E+07 | -3.5E+07 | -2.2E+07 | -4.3E+07 |
| 13 | -3.5E+07 | -1.1E+08 | -1.1E+08 | -2.6E+08 | -2.4E+08 | -1.5E+08 |
| 14 | -4.5E+08 | -5.5E+07 | -8.8E+07 | -1.8E+08 | -1.5E+08 | -1.8E+08 |
| 15 | -2.4E+08 | -1.6E+08 | -7.4E+07 | -1.3E+08 | -1899634 | -1.2E+08 |

**Table S5.** MCG groups and their serotype

| CGG | # of Strain | Serotype(# of Strain)                                               |
|-----|-------------|---------------------------------------------------------------------|
| 1   | 17          | 1/2(1); 2(11); 7(1); 14(3); 15(1)                                   |
| 2   | 3           | 8(3)                                                                |
| 3   | 6           | 4(1); 5(1); 17(1); 18(1); 19(1); 23(1)                              |
| 4   | 8           | 1/2(1); 2(2); 3(2); 7(3);                                           |
| 5   | 5           | 11(1); NA(4)                                                        |
| 6   | 18          | 2(1);13(1);21(1);24(1);27(1);29(4);NA(9)                            |
| 7   | 19          | 6(1);9(2);10(2);<br>16(1);20(1);22(1);25(1);26(1);30(1);31(1);NA(7) |

**Table S6.** Genetic Distance within and between minimal core genome groups<sup>#</sup>

|        | MCGG 1 | MCGG 2 | MCGG 3 | MCGG 4 | MCGG 5 | MCGG 6 | MCGG 7 |
|--------|--------|--------|--------|--------|--------|--------|--------|
| MCGG 1 | 0.023  |        |        |        |        |        |        |
| MCGG 2 | 0.115  | 0.003  |        |        |        |        |        |
| MCGG 3 | 0.131  | 0.133  | 0.087  |        |        |        |        |
| MCGG 4 | 0.145  | 0.135  | 0.121  | 0.042  |        |        |        |
| MCGG 5 | 0.143  | 0.145  | 0.149  | 0.149  | 0.043  |        |        |
| MCGG 6 | 0.158  | 0.163  | 0.155  | 0.168  | 0.167  | 0.125  |        |
| MCGG 7 | 0.159  | 0.161  | 0.160  | 0.165  | 0.156  | 0.172  | 0.155  |

<sup>#</sup>MCGGs: minimal core genome groups. The P-distance was used as genetic distance and calculated using MEGA.
